# Supplementary material for: Expanding the Phenotype of the CACNA1C-Associated Neurological Disorders in Children: Systematic Literature Review and Description of a Novel Mutation
Source: MDPI journal article supplement (doi:10.3390/children11050541), 2024-04-30
Supplement: s1 [file s1]

## CHECKLIST FOR CASE SERIES

Critical Appraisal tools for use in Systematic Reviews

|                                                                                                               | Ehtesham<br>[11], 2022 | Rodan [2],<br>2021 | Chen [24],<br>2019 | Bozarth<br>[26], 2018 | Quintela<br>[27], 2017 | Roberts<br>[28], 2014 |
|---------------------------------------------------------------------------------------------------------------|------------------------|--------------------|--------------------|-----------------------|------------------------|-----------------------|
| Were there clear criteria for inclusion in the case series?                                                   | Yes                    | Yes                | Yes                | Yes                   | Yes                    | Yes                   |
| Was the condition measured in a standard, reliable way for all participants included in the case series?      | Yes                    | Yes                | Yes                | Yes                   | Unclear                | Unclear               |
| Were valid methods used for identification of the condition for all participants included in the case series? | Yes                    | Yes                | Yes                | Yes                   | Yes                    | Yes                   |
| Did the case series have consecutive inclusion of participants?                                               | Yes                    | Yes                | Unclear            | No                    | No                     | No                    |
| Did the case series have complete inclusion of participants?                                                  | na                     | na                 | na                 | na                    | na                     | na                    |
| Was there clear reporting of the demographics of the participants in the study?                               | Yes                    | Yes                | Yes                | Yes                   | Yes                    | Yes                   |
| Was there clear reporting of clinical information of the participants?                                        | Yes                    | Yes                | Yes                | Yes                   | Yes                    | Yes                   |
| Were the outcomes or follow up results of cases clearly reported?                                             | Yes                    | Yes                | Yes                | Yes                   | Yes                    | Yes                   |
| Was there clear reporting of the presenting site(s)/clinic(s) demographic information?                        | Yes                    | Yes                | Yes                | Yes                   | Yes                    | Yes                   |
| Was statistical analysis appropriate?                                                                         | na                     | na                 | na                 | na                    | na                     | na                    |
